# Supplementary material
Source: publisher figshare collection journal article supplement (https://gsajournals.figshare.com/articles/dataset/_/6670892)
Supplement: Supplementary file 1 [file 1]

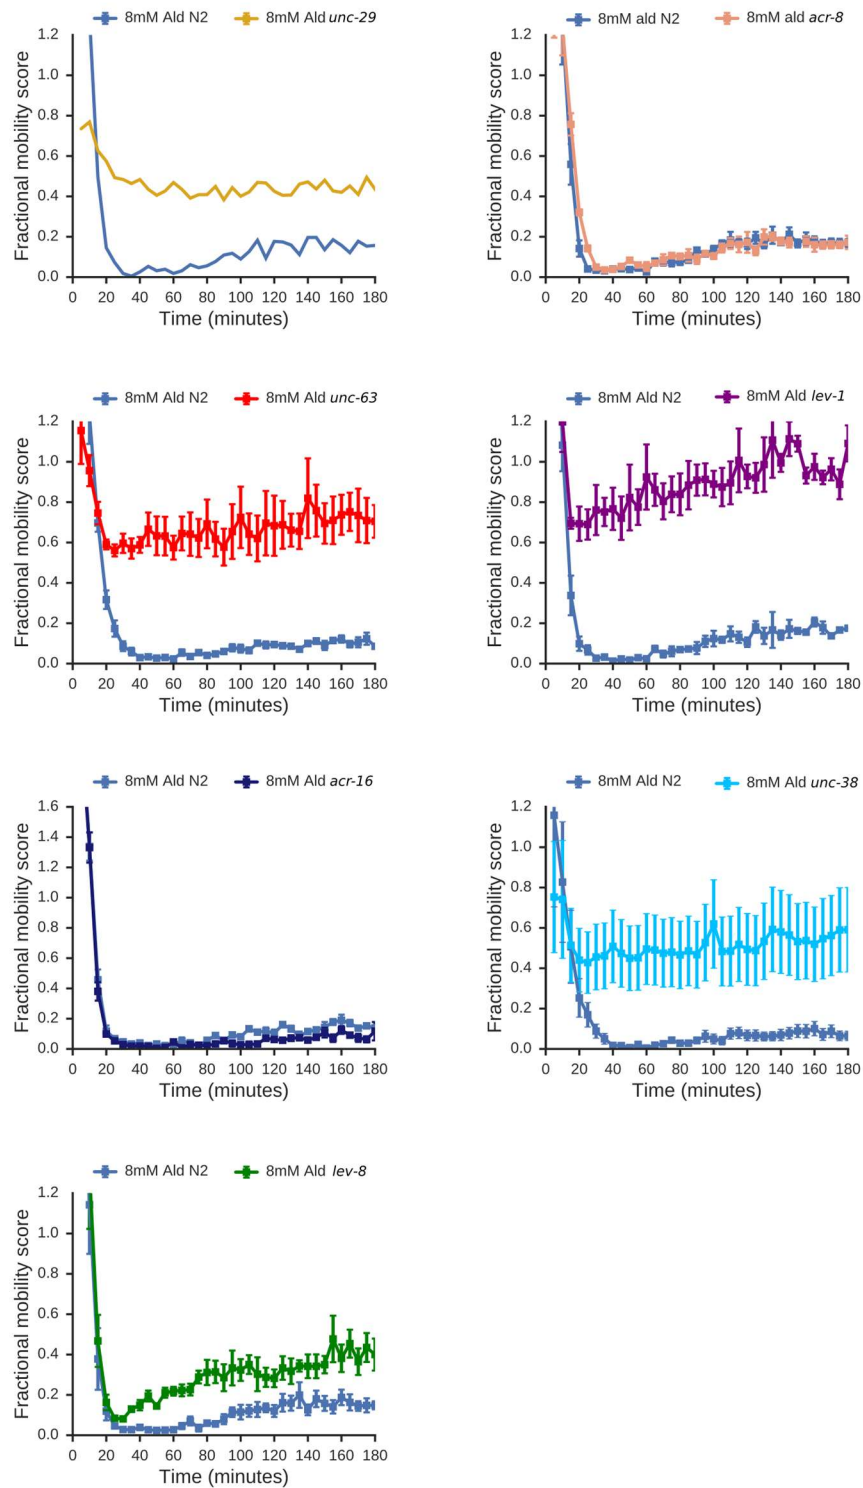

**Figure S1: Response of nAChR subunit mutants to aldicarb in adult worms**

Several nAChR subunits are required for wild-type sensitivity of L1 worms to 8mM aldicarb, including UNC-29, UNC-63, LEV1, LEV-8 and UNC-38. ACR-16 and ACR-8 are not required for

Ald-sensitivity in adults. All data are means of 3 independent replicates. Error bars are standard error of the mean.
