# Supplementary material
Source: publisher figshare collection journal article supplement (https://gsajournals.figshare.com/articles/dataset/_/6670892)
Supplement: Supplementary file 2 [file 1]

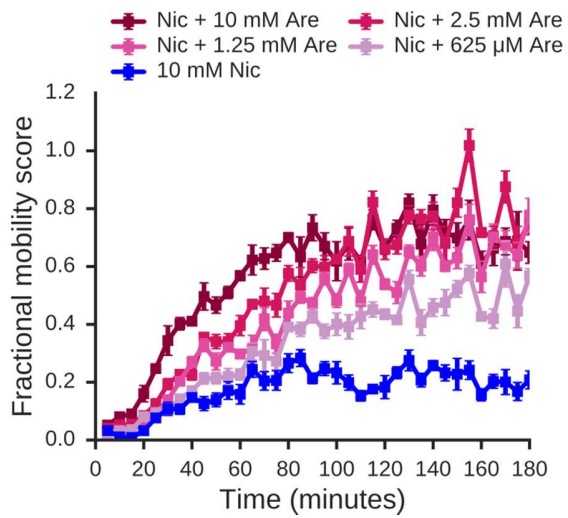

**Figure S5: Further characterization of mAChR recovery**

Arecoline (Are), a mAChR agonist induces recovery from paralysis under 10 mM Nic in the same manner as OxoM. Data are means of 4 wells. Error bars are standard error of the mean.
