# Supplementary material
Source: publisher figshare collection journal article supplement (https://gsajournals.figshare.com/articles/dataset/_/6670892)
Supplement: Supplementary file 3 [file 1]

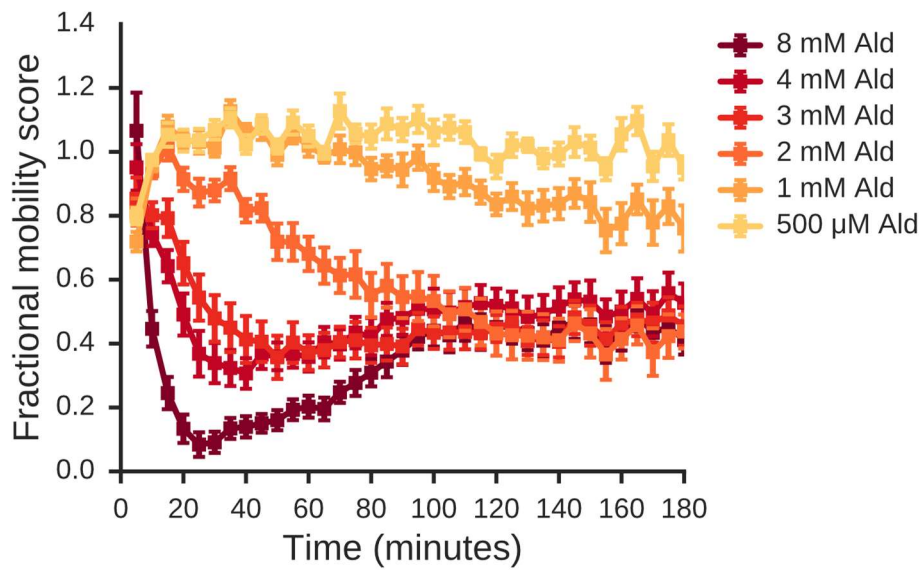

**Figure S4: Time course of response of L1 worms to a range of Ald concentrations.** Data are means of 4 independent experiments. Error bars are standard error of the mean.
